# Supplementary material for: The relation of poor mastication with cognition and dementia risk: a population-based longitudinal study
Source: publisher site journal article supplement (doi:10.18632/aging.103156), 2020-04-30
Supplement: Supplementary file [file aging-v12i9-103156-supplementary-material-SD1.pdf]

## SUPPLEMENTARY TABLE

**Supplementary Table 1. Multi-adjusted age-related differences in mean cognitive performance and decline (95% Confidence Intervals) in different domains by Eichner Index ( $n=544$ ).**

|                               | Eichner Index | Spatial/fluid abilities | Verbal ability          | Memory                 | Perceptual speed        | Component score*       |
|-------------------------------|---------------|-------------------------|-------------------------|------------------------|-------------------------|------------------------|
|                               |               | $\beta$ (95% CI)        | $\beta$ (95% CI)        | $\beta$ (95% CI)       | $\beta$ (95% CI)        | $\beta$ (95% CI)       |
| Intercept                     | A (Ref.)      | 64.26 (55.56 to 72.96)  | 46.00 (41.00 to 51.00)  | 60.47 (49.75 to 71.18) | 69.40 (62.40 to 76.40)  | 67.38 (58.90 to 75.85) |
|                               | B             | -6.15 (-16.95 to 4.65)  | -8.80 (-14.51 to -3.09) | -8.99 (-24.00 to 6.00) | -1.80 (-14.10 to 10.50) | -5.84 (-14.24 to 2.56) |
|                               | C             | -14.07 (-28.42 to 0.27) | 1.12 (-7.64 to 9.89)    | 1.00 (-20.50 to 22.50) | -0.13 (-13.55 to 13.29) | 4.16 (-10.28 to 18.59) |
| Slope (linear age up to 65)** |               |                         |                         |                        |                         |                        |
|                               | A (Ref.)      | -0.15 (-0.28 to -0.02)  | 0.08 (0.02 to 0.13)     | -0.18 (-0.35 to -0.02) | -0.24 (-0.34 to -0.14)  | -0.18 (-0.27 to -0.10) |
|                               | B             | 0.06(-0.11 to 0.24)     | 0.13 (0.05 to 0.21)     | 0.12 (-0.12 to 0.36)   | -0.02 (-0.22 to 0.19)   | 0.06 (-0.08 to 0.20)   |
|                               | C             | 0.16 (-0.07 to 0.39)    | -0.05 (-0.17 to 0.08)   | -0.05 (-0.38 to 0.29)  | -0.08 (-0.29 to 0.14)   | -0.12 (-0.35 to 0.11)  |
| Slope (linear age from 65)**  |               |                         |                         |                        |                         |                        |
|                               | A (Ref.)      | -0.27 (-0.37 to -0.18)  | -0.20 (-0.26 to -0.12)  | -0.24 (-0.35 to -0.12) | -0.61 (-0.70 to -0.51)  | -0.44 (-0.53 to -0.35) |
|                               | B             | -0.16 (-0.30 to -0.02)  | -0.07 (-0.19 to 0.04)   | -0.12 (-0.27 to 0.03)  | 0.01 (-0.13 to 0.15)    | -0.01 (-0.15 to 0.12)  |
|                               | C             | -0.15 (-0.30 to -0.01)  | -0.10 (-0.21 to 0.01)   | -0.12 (-0.27 to 0.04)  | -0.10 (-0.24 to 0.04)   | -0.12 (-0.27 to 0.03)  |

Model adjusted for sex, education, practice effect, birth cohort, hypertension, heart disease, *APOE*  $\epsilon 4$ , periodontal disease, childhood SES, prosthesis use, diabetes, cerebrovascular disease, and alcohol consumption. The reference group was Eichner Index A (optimal masticatory ability).

\* Component score of tests for spatial/fluid abilities, verbal ability, memory, and perceptual speed.

\*\* A spline was placed at age 65 for spatial/fluid abilities, memory, and perceptual speed and at age 70 for verbal ability.
